# Supplementary material for: Methylated HNRNPK acts on RPS19 to regulate ALOX15 synthesis in erythropoiesis
Source: PubMed Central journal article supplement — Nucleic Acids Res. 2021 Feb 28;49(6):3507–23. doi: 10.1093/nar/gkab116 (PMC8034617; doi:10.1093/nar/gkab116), 2021-02-28

**Naarmann-de Vries *et al.*, Supplementary Material**

**siRNAs**

| <b>siRNA</b>      | <b>Sequence</b>         | <b>Reference</b> |
|-------------------|-------------------------|------------------|
| <b>HNRNPK #1</b>  | AGACUACAAUGCCAGUGUUdTdT | (1)              |
| <b>HNRNPK #2</b>  | CUGUGGAAUGCUUAAAUUAdTdT | (1)              |
| <b>HNRNPK #3</b>  | GGAACAAGCAUUUAAAAGdTdT  | (1)              |
| <b>HNRNPE1 #1</b> | CUACUCGAUUCAAGGACAAdTdT | (1)              |
| <b>HNRNPE1 #2</b> | UGAACCAGGUGGCAAGACAdTdT | (1)              |
| <b>HNRNPE1 #3</b> | UCACCAUUCCAAUAACUdTdT   | (1)              |
| <b>PRMT1</b>      | GGACAUGACAUCCAAAGAAdTdT |                  |
| <b>ctrl.</b>      | AGGUAGUGUAAUCGCCUUGdTdT | (1)              |

**Antibodies for Western blot (WB) and immunofluorescence staining (IF)**

| <b>Name</b>                  | <b>Company/ Reference</b>                              | <b>Catalogue number</b> | <b>Dilution (WB)</b> | <b>Dilution (IF)</b> |
|------------------------------|--------------------------------------------------------|-------------------------|----------------------|----------------------|
| <b>PRMT1</b>                 | Merck, Darmstadt, Germany                              | 07-404                  | 1:2000               | 1:200                |
| <b>HNRNPK</b>                | Santa Cruz, Dallas, TX, USA                            | sc-28380                | 1:500                | 1:200                |
| <b>HNRNPK</b>                | Abcam, Cambridge, UK                                   | ab52600                 |                      | 1:200                |
| <b>Non-R<sup>met</sup> K</b> | (1)                                                    |                         | 1:10                 |                      |
| <b>admR</b>                  | (2)                                                    |                         | 1:50                 |                      |
| <b>HNRNPE1</b>               | Santa Cruz, Dallas, TX, USA                            | sc-16504                | 1:500                | 1:200                |
| <b>ALOX15</b>                | (3)                                                    |                         |                      | 1:200                |
| <b>VINCULIN</b>              | Merck, Darmstadt, Germany                              | V9131                   | 1:3000               |                      |
| <b>ELAVL1</b>                | Santa Cruz, Dallas, TX, USA                            | Sc-5261                 | 1:200                |                      |
| <b>DDX6</b>                  | Novus Biologicals, Centennial, CO, USA                 | NB200-191               | 1:5000               | 1:800                |
| <b>DCP1A</b>                 | Abnova, Taipei, Taiwan                                 | H00055802-M06           |                      | 1:400                |
| <b>HNRNPL</b>                | Santa Cruz, Dallas, TX, USA                            | sc-32317                | 1:500                | 1:100                |
| <b>RPS3</b>                  | NEB, Ipswich, MA, USA                                  | #2579                   | 1:1000               |                      |
| <b>RPS19*</b>                | Abcam, Cambridge, UK                                   | ab181365                | 1:1000               | 1:200                |
| <b>RPS19**</b>               | Abcam, Cambridge, UK                                   | ab40833                 | 1:500                | 1:200                |
| <b>RPS19***</b>              | Abnova, Taipeh, Taiwan                                 | H00006223-M01           | 1:500                |                      |
| <b>RPL19</b>                 | Santa Cruz, Dallas, TX, USA                            | K-12/sc-100830          | 1:200                |                      |
| <b>GAPDH</b>                 | Abcam, Cambridge, UK                                   | 8245-100                | 1:5000               |                      |
| <b>ACTB</b>                  | Merck, Darmstadt, Germany                              | A1978                   | 1:2000               |                      |
| <b>UBIQUITIN</b>             | Cell Signaling, Danvers, MA, USA                       | #3936                   | 1:1000               |                      |
| <b>Puromycin</b>             | Merck, Darmstadt, Germany                              | MABE343                 | 1:25000              |                      |
| RPS19*                       | used for Western blot analyses if not otherwise stated |                         |                      |                      |
| RPS19**                      | applied for Figure 6B                                  |                         |                      |                      |
| RPS19***                     | applied for Figure 2H                                  |                         |                      |                      |

## Cloning primers

| Construct                   | Primer | Sequence                                                         |
|-----------------------------|--------|------------------------------------------------------------------|
| <b>pET16b-RPS19 wt</b>      | fw     | ttagttggatccgatgcctggagtactg                                     |
|                             | rv     | cgaggcggatcctactaatgcttcttg                                      |
| <b>pET16b-RPS19 W52R</b>    | fw     | gatgagaaccggttctacacgcgagc                                       |
|                             | rv     | gctcgcgtgtagaacgggttctcatc                                       |
| <b>pET16b-RPS19 F21A</b>    | fw     | agagctctggcagccgccctcaaaaagtccggg                                |
|                             | rv     | cccggactttttgagggcggtgccagactct                                  |
| <b>pSUPERIOR-Scr</b>        | fw     | gatccccaggtagtgtaatcgccttgttcaagagacaaggcgattaca<br>ctaccttttta  |
|                             | rv     | agcttaaaaaggtagtgtaatcgccttgtctcttgaacaaggcgatta<br>cactacctggg  |
| <b>pSUPERIOR-RPS19(495)</b> | fw     | gatccccgcacaaagagcttgctccctcaagagagggagcaagct<br>ctttgtgctttta   |
|                             | rv     | agcttaaaaagcacaaagagcttgctccctctcttgaagggagcaag<br>ctctttgtcggg  |
| <b>pSUPERIOR-RPS19(738)</b> | fw     | gatccccactgacacctcagggacaattcaagagattgtccctgaggt<br>gtcagttttta  |
|                             | rv     | agcttaaaaactgacacctcagggacaattctcttgaattgtccctgag<br>gtgtcagtggg |

**qPCR primer**

| <b>target</b> | <b>Primer</b> | <b>Requence</b>        | <b>Reference</b> |
|---------------|---------------|------------------------|------------------|
| <b>RPS19</b>  | fw            | acacgcgagctgctccaca    |                  |
|               | rv            | agtttgcggccgcatcttg    |                  |
| <b>ACTB</b>   | rv            | tccctggagaagagctacg    | (4)              |
|               | rv            | gtagtttcgtgatgccaca    | (4)              |
| <b>18S</b>    | fw            | ctggataccgcagctaggaata | (5)              |
|               | rv            | ccggtccaagaattcacctct  | (5)              |
| <b>28S</b>    | fw            | cccagtgctctgaatgtaa    | (6)              |
|               | rv            | agtgggaatctcgttcaccc   | (6)              |
| <b>ALOX15</b> | fw            | aggtcaggttccttgttac    |                  |
|               | rv            | gaattaacccgtcctccag    |                  |
| <b>HBG1</b>   | fw            | aaaccctgggaaggctcct    | (1)              |
|               | rv            | tcccaggagcttgaagttc    | (1)              |
| <b>blaR</b>   | fw            | gaaatgagaacaggggcatc   |                  |
|               | rv            | ttagccctcccacacataac   |                  |

### **Legends to Supplementary Figures**

#### **Figure S1: Immunofluorescence staining of K562 cells with antibodies for PLA analysis.**

K562 cells were either left untreated (0d) or induced for erythroid maturation with 1.5 mM sodium butyrate for eight days (8d). The localization of DDX6 and the P-body marker DCP1A, HNRNPK and RPS19, as well as HNRNPL, was detected with specific antibodies as indicated, which were recognized by fluorophore-coupled secondary antibodies (anti-rabbit-Cy3, anti-mouse-FITC). Staining of nuclei with DAPI. **B)** Quantification of the PLA assay shown in (Figure 3A). Red signals per cell were determined in 10 images of three independent experiments each. Student's t-test for significance (\*\*\*) $p < 0.001$ .

#### **Figure S2: Analysis of melting curves of His-RPS19 variants**

Analysis of melting curves of His-RPS19 wild type or the related variants, as indicated (mean $\pm$ s.d., n=3).

#### **Figure S3: Analysis of the HNRNPK – RPS19 interaction with the TSA.**

**A-F)** Raw data ( $T_m$ ) of the TSA analysis for RPS19 wt and variants W52R and non-related F21A as control, with the non-methylated HNRNPK and HNRNPK<sup>5Rmet</sup> derived peptides P1, P2 and P1m, P2m, respectively, which were used to extract  $\Delta T_m$  values in Figure 4D and E as well as Figure S3 D-F. **D-F)** TSA analysis of the interaction between RPS19 wt, -W52R and -F21A and peptide P1 (D), peptide P2 (E) and peptide P2m (F). The  $\Delta T_m$  relative to the reaction without peptide addition is shown.

**Figure S4:**

**Specificity control of immunofluorescence staining.**

K562 wt cells and RPS19-depleted K562 clone A were subjected to immunofluorescence analysis as in Figure 7D, except that primary ALOX15 and RPS19 antibodies were omitted.

## Supplementary References

1. Naarmann, I.S., Harnisch, C., Flach, N., Kremmer, E., Kuhn, H., Ostareck, D.H. and Ostareck-Lederer, A. (2008) mRNA silencing in human erythroid cell maturation: heterogeneous nuclear ribonucleoprotein K controls the expression of its regulator c-Src. *J Biol Chem*, **283**, 18461-18472.
2. Gross, H., Hennard, C., Masouris, I., Cassel, C., Barth, S., Stober-Grasser, U., Mamiani, A., Moritz, B., Ostareck, D., Ostareck-Lederer, A. *et al.* (2012) Binding of the heterogeneous ribonucleoprotein K (hnRNP K) to the Epstein-Barr virus nuclear antigen 2 (EBNA2) enhances viral LMP2A expression. *PLoS One*, **7**, e42106.
3. Rapoport, S.M., Schewe, T., Wiesner, R., Halangk, W., Ludwig, P., Janicke-Hohne, M., Tannert, C., Hiebsch, C. and Klatt, D. (1979) The lipoxygenase of reticulocytes. Purification, characterization and biological dynamics of the lipoxygenase; its identity with the respiratory inhibitors of the reticulocyte. *Eur J Biochem*, **96**, 545-561.
4. Stohr, N., Lederer, M., Reinke, C., Meyer, S., Hatzfeld, M., Singer, R.H. and Huttelmaier, S. (2006) ZBP1 regulates mRNA stability during cellular stress. *J Cell Biol*, **175**, 527-534.
5. Naarmann-de Vries, I.S., Brendle, A., Bahr-Ivacevic, T., Benes, V., Ostareck, D.H. and Ostareck-Lederer, A. (2016) Translational control mediated by hnRNP K links NMHC IIA to erythroid enucleation. *J Cell Sci*, **129**, 1141-1154.
6. Weidensdorfer, D., Stohr, N., Baude, A., Lederer, M., Kohn, M., Schierhorn, A., Buchmeier, S., Wahle, F. and Huttelmaier, S. (2009) Control of c-myc mRNA stability by IGF2BP1-associated cytoplasmic RNPs. *RNA*, **15**, 104-115.

# Figure S1

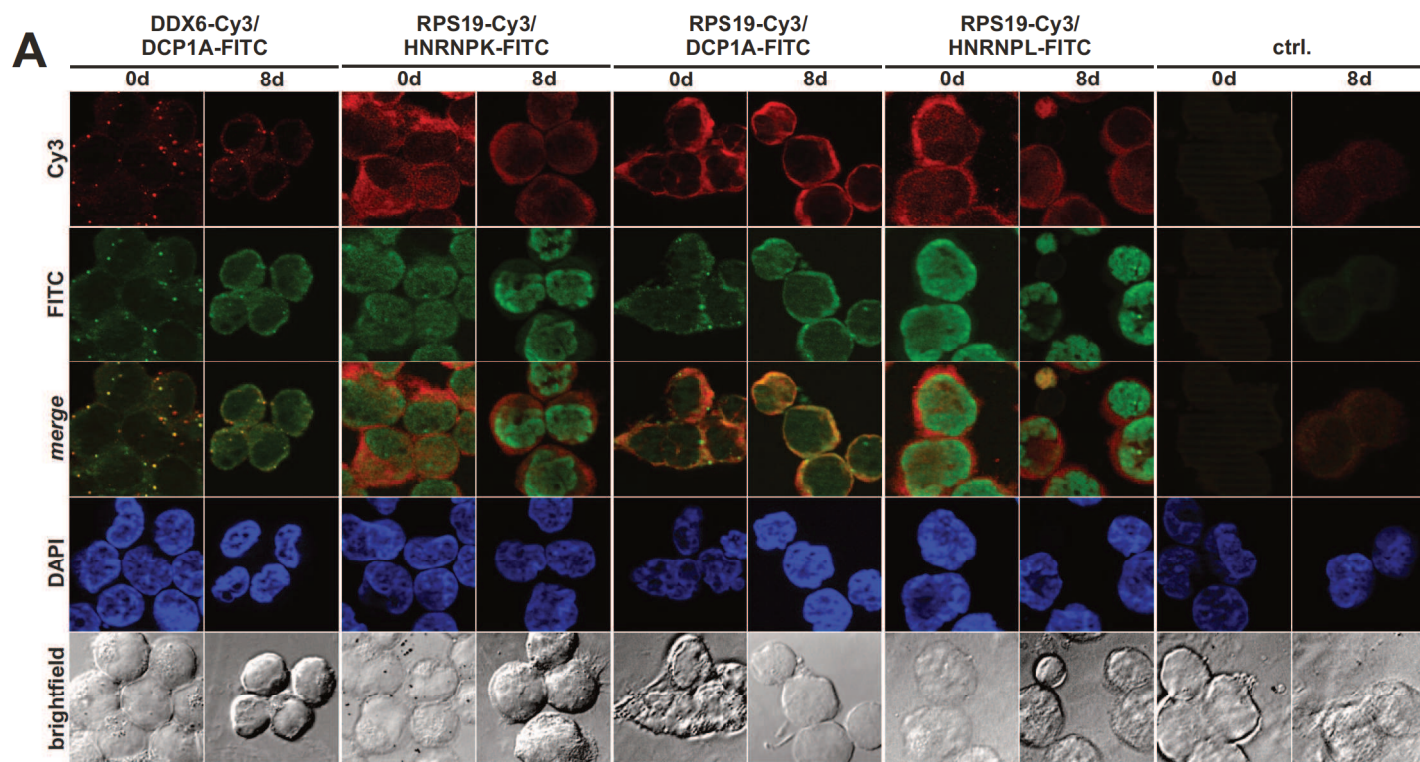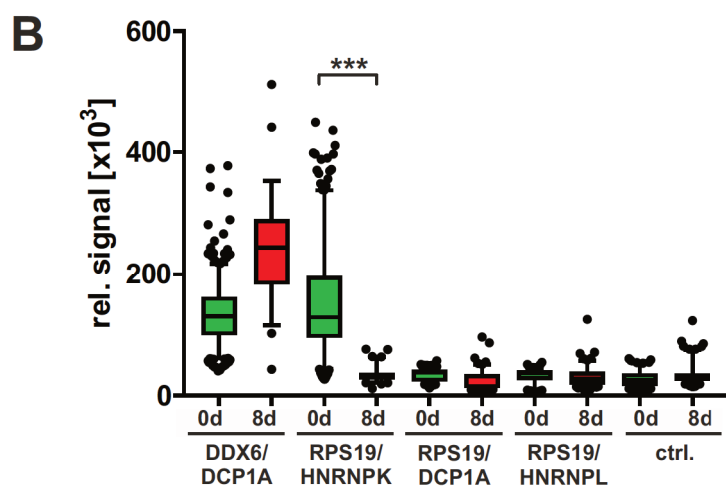



# Figure S2

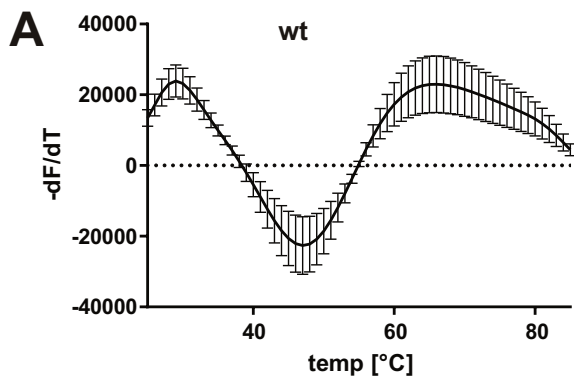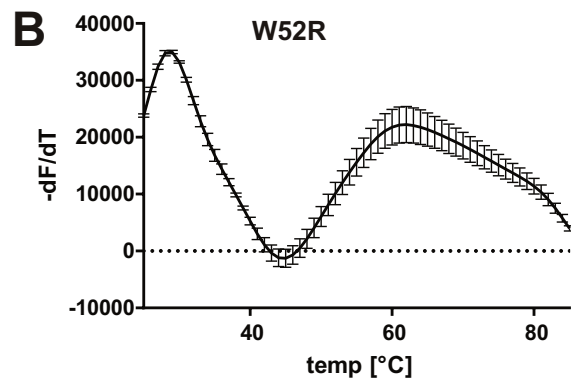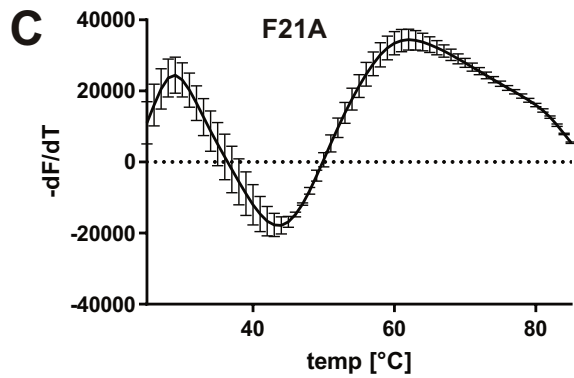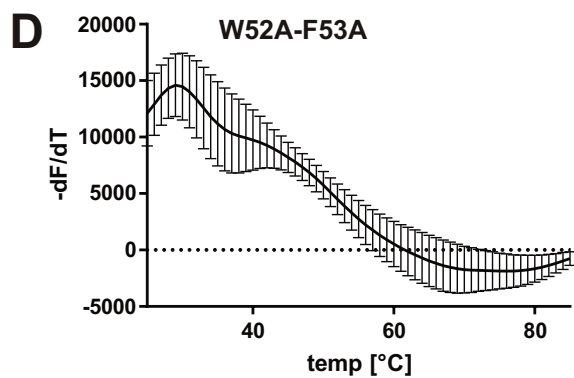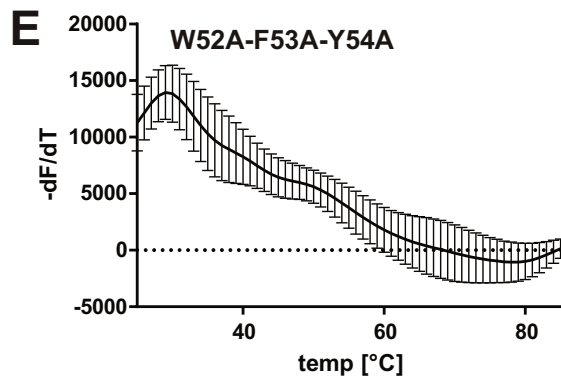

# Figure S3

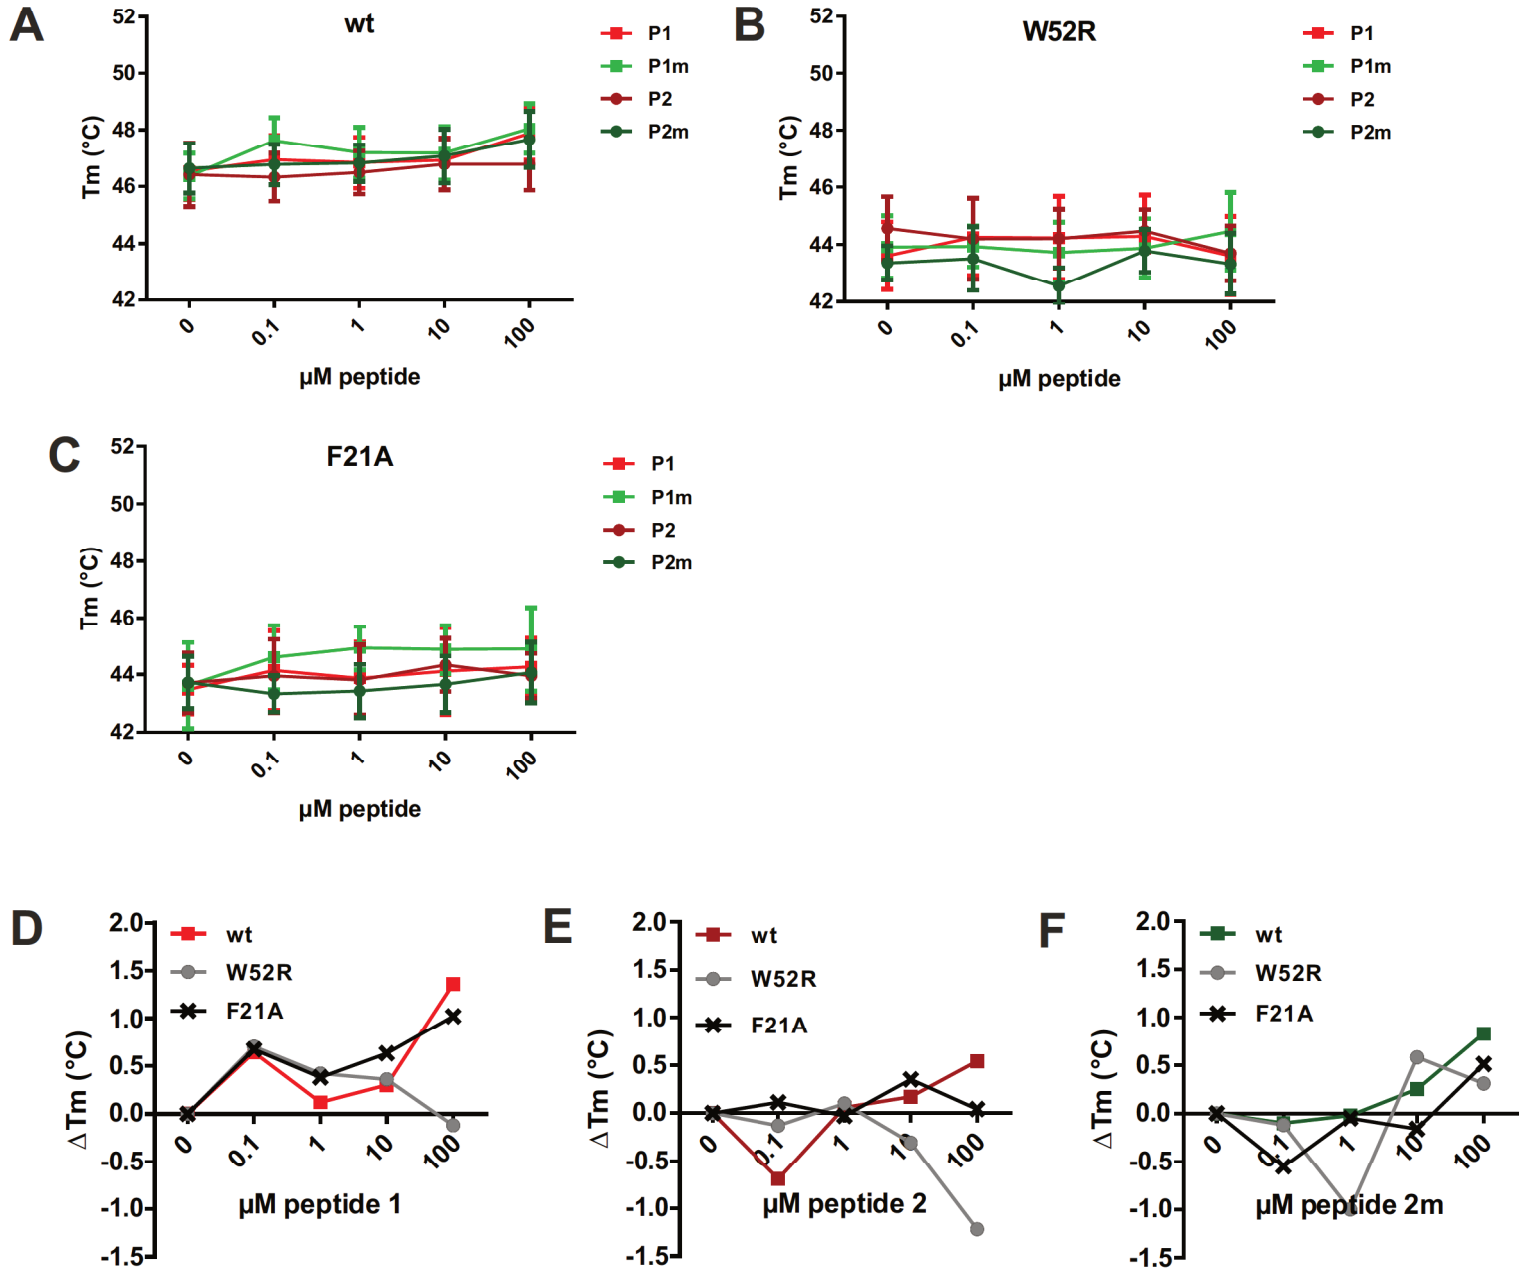

# Figure S4

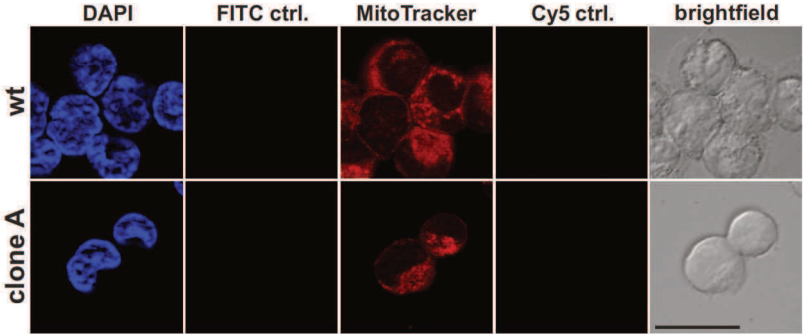

Supplement: gkab116_supplemental_file.pdf [file gkab116_supplemental_file.pdf]
